# Supplementary material
Source: Research Square preprint supplement (doi:10.21203/rs.3.rs-10320606/v1)
Supplement: Supplementary file 2 [file 7ce88ee08d6fddfeba13193d.docx]

| **Locus** | **Amplification success (AS) (emmean ± SE)** | **Allelic dropout (ADO) (emmean ± SE)** | **False allele (FA) (emmean ± SE)** |
| --- | --- | --- | --- |
| D10S1248 | 4.91 ± 0.34 | -4.16 ± 0.42 | -4.74 ± 0.29 |
| CSF1PO | 3.42 ± 0.18 | -2.36 ± 0.23 | -3.08 ± 0.14 |
| D13S317 | 4.58 ± 0.30 | -3.39 ± 0.33 | -4.38 ± 0.25 |
| D16S539 | 3.75 ± 0.21 | -2.71 ± 0.26 | -3.77 ± 0.19 |
| D21S11 | 4.04 ± 0.24 | -3.56 ± 0.34 | -4.15 ± 0.23 |
| D22S1045 | 2.78 ± 0.14 | -3.39 ± 0.35 | -4.74 ± 0.29 |
| D2S1338 | 3.04 ± 0.15 | -3.49 ± 0.33 | -3.36 ± 0.16 |
| D2S441 | 4.58 ± 0.30 | -3.43 ± 0.33 | -4.23 ± 0.24 |
| D3S1358 | 4.43 ± 0.28 | -4.02 ± 0.40 | -4.23 ± 0.24 |
| D5S818 | 3.78 ± 0.21 | -4.20 ± 0.43 | -4.38 ± 0.25 |
| D7S820 | 2.53 ± 0.13 | -2.81 ± 0.25 | -3.71 ± 0.19 |
| D8S1179 | 3.77 ± 0.21 | -3.42 ± 0.32 | -4.00 ± 0.21 |
| FGA | 4.91 ± 0.34 | -3.49 ± 0.33 | -4.15 ± 0.23 |
| TH01 | 4.27 ± 0.26 | -2.18 ± 0.20 | -4.38 ± 0.25 |
| TPOX | 3.25 ± 0.17 | -1.99 ± 0.21 | -3.44 ± 0.16 |
| VWA | 3.99 ± 0.24 | -3.17 ± 0.30 | -3.92 ± 0.20 |

**Additional file 2:** Estimated marginal means (EMMs) for amplification success, allelic dropout (ADO), and false allele (FA) across microsatellite loci derived from generalized linear mixed models (GLMMs). Values are presented as model-predicted marginal means ± standard error (SE) on the logit scale, averaged across sample types. Higher EMM values for amplification success indicate improved amplification performance, whereas lower EMM values for ADO and FA indicate reduced genotyping error rates.
