# Supplementary material
Source: Research Square preprint supplement (doi:10.21203/rs.3.rs-10320606/v1)
Supplement: Supplementary file 3 [file a351446a064a0e27fd49ff8d.docx]

| **Predictor** | **Amplification success (AS) (β ± SE)** | **Allelic dropout (ADO) (β ± SE)** | **False allele (FA)**  **(β ± SE)** |
| --- | --- | --- | --- |
| Intercept | **5.87 ± 0.37** | **-3.06 ± 0.27** | **-3.65 ± 0.17** |
| Sample Fecal sanctuary | **-0.91 ± 0.18** | 0.64 ± 0.26 | **0.35 ± 0.16** |
| Sample Fecal wild | **-1.97 ± 0.17** | 2.55 ± 0.24 | **1.34 ± 0.14** |
| D10S1248 | Reference | **-2.17 ± 0.45** | **-1.66 ± 0.32** |
| CSF1PO | **-1.49 ± 0.38** | **-0.36 ± 0.30** | Reference |
| D13S317 | -0.33 ± 0.44 | **-1.40 ± 0.37** | **-1.29 ± 0.28** |
| D16S539 | **-1.16 ± 0.39** | **-0.72 ± 0.32** | **-0.69 ± 0.23** |
| D21S11 | **-0.86 ± 0.40** | **-1.56 ± 0.38** | **-1.07 ± 0.26** |
| D22S1045 | **-2.13 ± 0.36** | **-1.39 ± 0.39** | **-1.66 ± 0.32** |
| D2S1338 | **-1.86 ± 0.37** | **-1.49 ± 0.38** | -0.27 ± 0.21 |
| D2S441 | -0.33 ± 0.44 | **-1.43 ± 0.38** | **-1.15 ± 0.27** |
| D3S1358 | -0.48 ± 0.43 | **-2.03 ± 0.43** | **-1.15 ± 0.27** |
| D5S818 | **-1.13 ± 0.39** | **-2.21 ± 0.46** | **-1.29 ± 0.28** |
| D7S820 | **-2.38 ± 0.36** | **-0.82 ± 0.32** | **-0.63 ± 0.23** |
| D8S1179 | **-1.14 ± 0.39** | **-1.43 ± 0.37** | **-0.92 ± 0.25** |
| FGA | 0.00 ± 0.46 | **-1.49 ± 0.38** | **-1.07 ± 0.26** |
| TH01 | -0.63 ± 0.42 | -0.19 ± 0.28 | **-1.29 ± 0.28** |
| TPOX | **-1.66 ± 0.37** | Reference | -0.35 ± 0.21 |
| VWA | **-0.92 ± 0.40** | **-1.17 ± 0.35** | **-0.83 ± 0.25** |

**Additional file 1:** Parameter estimates (β ± SE) from beta regression models (logit link) evaluating the effects of sample type and STR locus on amplification success (AS), allelic dropout (ADO), and false allele (FA) rates. Blood samples served as the reference sample type in all models. For locus effects, D10S1248 (AS), TPOX (ADO), and CSF1PO (FA) were used as the reference loci because they exhibited the highest values for their respective metrics. Negative coefficients indicate lower values of the response variable relative to the reference, whereas positive coefficients indicate higher values.
